# Supplementary material for: A Novel 13q12 Microdeletion Associated with Familial Syndromic Corneal Opacification
Source: MDPI journal article supplement (doi:10.3390/genes14051034), 2023-05-01
Supplement: s1 [file s1]

| Gene     | Location                 | Variant             | gnomAD AF [1]        | CADD [2] | Revel [3] | Associated Phenotypes                                                                    | Interpretation |
|----------|--------------------------|---------------------|----------------------|----------|-----------|------------------------------------------------------------------------------------------|----------------|
| LOXHD1   | 18:44,056,924-44,237,183 | c.1763 G>C; p.G579A | 0                    | 25.2     | 0.822     | <b>Recessive</b> Nonsyndromic Hearing Loss [4];<br>Dominant Late-Onset Fuch's [5]        | VUS            |
| SLC16A12 | 10:91,190,056-91,295,351 | c.113 G>A; p.R38Q   | 1.6E10 <sup>-5</sup> | 13.71    | 0.105     | Dominant Juvenile and Age-Related Cataracts,<br>Microcornea, and Renal Glucosuria [6, 7] | VUS            |

**Table S1:** Genetic variants segregating in all three affected family members, their locations (hg19), their gnomAD allele frequencies, CADD and REVEL scores, and associated phenotypes. VUS is variant of uncertain significance.

| <b>Gene</b> | <b>Location</b>          | <b>Human LOF Phenotype</b>                   |
|-------------|--------------------------|----------------------------------------------|
| CRYL1       | 13:20,977,808-21,099,996 | Hearing Loss [8, 9]                          |
| IFT88       | 13:21,141,296-21,265,583 | Retinal Degeneration; NS CL/CP [10, 11]      |
| IL17D       | 13:21,275,652-21,297,237 | N/A                                          |
| EEF1AKMT1   | 13:21,302,870-21,348,100 | N/A                                          |
| XPO4        | 13:21,351,468-21,476,913 | Laryngomalacia, Developmental Delay [8, 12]  |
| LATS2       | 13:21,547,175-21,635,725 | Cardiac Defects, Cancer Development [12, 13] |
| SAP18       | 13:21,140,119-21,149,097 | N/A                                          |
| SKA3        | 13:21,727,734-21,750,691 | N/A                                          |
| MRP63       | 13:21,750,797-21,753,223 | N/A                                          |
| MIPEPP3     | 13:21,872,264-21,967,062 | N/A                                          |
| ZDHHC20     | 13:21,946,710-22,033,442 | N/A                                          |
| MICU2       | 13:21,946,710-22,033,442 | Neurodevelopmental Disorder [14]             |

**Table S2:** Genes within the microdeletion, their location (hg19), and any suggested loss of function (LOF) human phenotypes.

| GO Biological Process                                         | Fold Enrichment | Raw P-Value | FDR      |
|---------------------------------------------------------------|-----------------|-------------|----------|
| External Encapsulating Structure Organization                 | 8.73            | 2.93E-15    | 1.53E-11 |
| Extracellular Structure Organization                          | 8.79            | 2.53E-15    | 1.99E-11 |
| Extracellular Matrix Organization                             | 8.82            | 2.35E-15    | 3.69E-11 |
| Tube Development                                              | 3.49            | 4.09E-09    | 1.60E-05 |
| Blood Vessel Development                                      | 4.44            | 1.01E-08    | 3.18E-05 |
| Vasculature Development                                       | 4.26            | 2.09E-08    | 4.69E-05 |
| Collagen Fibril Organization                                  | 15.44           | 2.03E-08    | 5.30E-05 |
| Tube Morphogenesis                                            | 3.52            | 2.72E-07    | 4.74E-04 |
| Collagen Metabolic Process                                    | 13.5            | 3.23E-07    | 5.06E-04 |
| Blood Vessel Morphogenesis                                    | 4.4             | 2.71E-07    | 5.31E-04 |
| Cellular Response to Amino Acid Stimulus                      | 11.13           | 1.24E-06    | 1.49E-03 |
| Angiogenesis                                                  | 4.72            | 1.21E-06    | 1.58E-03 |
| Circulatory System Development                                | 2.94            | 1.17E-06    | 1.67E-03 |
| Ossification                                                  | 4.97            | 1.57E-06    | 1.75E-03 |
| Eye Development                                               | 4.29            | 1.77E-06    | 1.85E-03 |
| Visual System Development                                     | 4.25            | 2.01E-06    | 1.97E-03 |
| Cellular Response to Acid Chemical                            | 10.04           | 2.52E-06    | 1.97E-03 |
| Tissue Development                                            | 2.27            | 2.29E-06    | 2.00E-03 |
| Sensory System Development                                    | 4.18            | 2.43E-06    | 2.00E-03 |
| Animal Organ Morphogenesis                                    | 2.77            | 2.19E-06    | 2.02E-03 |
| Response to Wounding                                          | 3.92            | 2.73E-06    | 2.04E-03 |
| Anatomical Structure Morphogenesis                            | 2.07            | 3.32E-06    | 2.36E-03 |
| Cellular Response to Transforming Growth Factor Beta Stimulus | 6.68            | 4.40E-06    | 3.00E-03 |
| Odontogenesis                                                 | 7.35            | 6.48E-06    | 3.77E-03 |
| Regulation of Collagen Metabolic Process                      | 14.71           | 6.45E-06    | 3.89E-03 |
| Eye Morphogenesis                                             | 6.43            | 6.06E-06    | 3.96E-03 |
| Response to Transforming Growth Factor Beta                   | 6.39            | 6.38E-06    | 4.00E-03 |
| Wound Healing                                                 | 4.26            | 8.50E-06    | 4.76E-03 |
| Cell Adhesion                                                 | 2.66            | 1.10E-05    | 5.95E-03 |
| Positive Regulation of Collagen Biosynthetic Process          | 19.06           | 1.28E-05    | 6.68E-03 |
| Positive Regulation of Collagen Metabolic Process             | 18.38           | 1.49E-05    | 7.32E-03 |
| Negative Regulation of Developmental Process                  | 2.68            | 1.48E-05    | 7.48E-03 |
| Supramolecular Fiber Organization                             | 3.19            | 2.04E-05    | 9.70E-03 |
| Enzyme-Linked Receptor Protein Signaling Pathway              | 3.06            | 2.16E-05    | 9.98E-03 |
| Response to Amino Acid                                        | 7.29            | 2.27E-05    | 1.02E-02 |
| Camera-Type Eye Development                                   | 4.01            | 3.35E-05    | 1.46E-02 |
| Regulation of Collagen Biosynthetic Process                   | 13.91           | 4.99E-05    | 2.12E-02 |
| Response to Acid Chemical                                     | 6.43            | 5.25E-05    | 2.16E-02 |
| System Development                                            | 1.64            | 5.42E-05    | 2.18E-02 |
| Anatomical Structure Formation Involved in Morphogenesis      | 2.52            | 5.72E-05    | 2.24E-02 |
| Sensory Organ Development                                     | 3.01            | 7.22E-05    | 2.76E-02 |
| Cellular Process                                              | 1.16            | 7.75E-05    | 2.89E-02 |
| Response to Endogenous Stimulus                               | 2.18            | 8.92E-05    | 3.25E-02 |
| Regulation of Biomineralization                               | 7               | 9.47E-05    | 3.37E-02 |
| Direct Ossification                                           | 44.12           | 1.00E-04    | 3.41E-02 |
| Regulation of Smooth Muscle Cell Proliferation                | 5.8             | 1.05E-04    | 3.41E-02 |
| Intramembranous Ossification                                  | 44.12           | 1.00E-04    | 3.49E-02 |
| Osteoblast Differentiation                                    | 5.8             | 1.05E-04    | 3.49E-02 |
| Multicellular Organism Development                            | 1.56            | 1.46E-04    | 4.68E-02 |

**Table S3:** All significant Gene Ontology (GO) processes [15] for upregulated genes with an adjusted p-value of less than or equal to 1e-10. FDR is false discovery rate.

## Supplemental References

1. Chen, S.; Francioli, L. C.; Goodrich, J. K.; Collins, R. L.; Wang, Q.; Alföldi, J.; Watts, N. A.; Vittal, C.; Gauthier, L. D.; Poterba, T.; et al. A genome-wide mutational constraint map quantified from variation in 76,156 human genomes. *bioRxiv* 2022.03.20.485034 (2022). <https://doi.org/10.1101/2022.03.20.485034>. (accessed on 15 March 2023).
2. Kircher, M.; Witten, D.M.; Jain, P.; O’Roak, B.J.; Cooper, G.M.; Shendure, J. A general framework for estimating the relative pathogenicity of human genetic variants. *Nat. Genet.* 2014, 46, 310–315. <https://doi.org/10.1038/ng.2892>.
3. Ioannidis, N.M.; Rothstein, J.H.; Pejaver, V.; Middha, S.; McDonnell, S.K.; Baheti, S.; Musolf, A.; Li, Q.; Holzinger, E.; Karyadi, D.; et al. REVEL: An Ensemble Method for Predicting the Pathogenicity of Rare Missense Variants. *Am. J. Hum. Genet.* 2016, 99, 877–885. <https://doi.org/10.1016/j.ajhg.2016.08.016>.
4. Yu, S.; Chen, W.X.; Zhang, Y.F.; Chen, C.; Ni, Y.; Duan, B.; Wang, H.; Xu, Z.M. Recessive LOXHD1 variants cause a prelingual down-sloping hearing loss: Genotype-phenotype correlation and three additional children with novel variants. *Int. J. Pediatr. Otorhinolaryngol.* 2021, 145, 110715. <https://doi.org/10.1016/j.ijporl.2021.110715>.
5. Riazuddin, S.A.; Parker, D.S.; McGlumphy, E.J.; Oh, E.C.; Iliff, B.W.; Schmedt, T.; Jurkunas, U.; Schleif, R.; Katsanis, N.; Gottsch, J.D. Mutations in LOXHD1, a recessive-deafness locus, cause dominant late-onset Fuchs corneal dystrophy. *Am. J. Hum. Genet.* 2012, 90, 533–539. <https://doi.org/10.1016/j.ajhg.2012.01.013>.
6. Kloeckener-Gruissem, B.; Vandekerckhove, K.; Nurnberg, G.; Neidhardt, J.; Zeitz, C.; Nurnberg, P.; Schipper, I.; Berger, W. Mutation of solute carrier SLC16A12 associates with a syndrome combining juvenile cataract with microcornea and renal glucosuria. *Am. J. Hum. Genet.* 2008, 82, 772–779. <https://doi.org/10.1016/j.ajhg.2007.12.013>.
7. Zuercher, J.; Neidhardt, J.; Magyar, I.; Labs, S.; Moore, A.T.; Tanner, F.C.; Waseem, N.; Schorderet, D.F.; Munier, F.L.; Bhattacharya, S.; et al. Alterations of the 5’ untranslated region of SLC16A12 lead to age-related cataract. *Investig. Ophthalmol. Vis. Sci.* 2010, 51, 3354–3361. <https://doi.org/10.1167/iovs.10-5193>.
8. Firth, H.V.; Richards, S.M.; Bevan, A.P.; Clayton, S.; Corpas, M.; Rajan, D.; Van Vooren, S.; Moreau, Y.; Pettett, R.M.; Carter, N.P. DECIPHER: Database of Chromosomal Imbalance and Phenotype in Humans using Ensembl Resources. *Am. J. Hum. Genet.* 2009, 84, 524–533. <https://doi.org/10.1016/j.ajhg.2009.03.010>. (accessed on 18 January 2023).
9. Hoefsloot, L.H.; Roux, A.F.; Bitner-Glindzicz, M. EMQN Best Practice guidelines for diagnostic testing of mutations causing non-syndromic hearing impairment at the DFNB1 locus. *Eur. J. Hum. Genet.* 2013, 21, 1325–1329. <https://doi.org/10.1038/ejhg.2013.83>.
10. Chekuri, A.; Guru, A.A.; Biswas, P.; Branham, K.; Borooah, S.; Soto-Hermida, A.; Hicks, M.; Khan, N.W.; Matsui, H.; Alapati, A.; et al. IFT88 mutations identified in individuals with non-syndromic recessive retinal degeneration result in abnormal ciliogenesis. *Hum. Genet.* 2018, 137, 447–458. <https://doi.org/10.1007/s00439-018-1897-9>.
11. Barba, A.; Urbina, C.; Maili, L.; Greives, M.R.; Blackwell, S.J.; Mulliken, J.B.; Chiquet, B.; Blanton, S.H.; Hecht, J.T.; Letra, A. Association of IFT88 gene variants with nonsyndromic cleft lip with or without cleft palate. *Birth Defects Res.* 2019, 111, 659–665. <https://doi.org/10.1002/bdr2.1504>.
12. Sobreira, N.; Schiettecatte, F.; Valle, D.; Hamosh, A. GeneMatcher: A matching tool for connecting investigators with an interest in the same gene. *Hum. Mutat.* 2015, 36, 928–930. <https://doi.org/10.1002/humu.22844>. (accessed on 18 January 2023).
13. Furth, N.; Aylon, Y. The LATS1 and LATS2 tumor suppressors: Beyond the Hippo pathway. *Cell Death Differ.* 2017, 24, 1488–1501. <https://doi.org/10.1038/cdd.2017.99>.
14. Shamseldin, H.E.; Alasmari, A.; Salih, M.A.; Samman, M.M.; Mian, S.A.; Alshidi, T.; Ibrahim, N.; Hashem, M.; Fageih, E.; Al-Mohanna, F.; et al. A null mutation in MICU2 causes abnormal mitochondrial calcium homeostasis and a severe neurodevelopmental disorder. *Brain* 2017, 140, 2806–2813. <https://doi.org/10.1093/brain/awx237>.
15. Mi, H.; Muruganujan, A.; Ebert, D.; Huang, X.; Thomas, P.D. PANTHER version 14: More genomes, a new PANTHER GO-slim and improvements in enrichment analysis tools. *Nucleic Acids Res.* 2019, 47, D419–D426. <https://doi.org/10.1093/nar/gky1038>.
